# Supplementary material for: New Developments in the Synthesis of EMICORON
Source: PubMed Central journal article supplement (PMC6165106; doi:10.3390/ht7030022), 2018-08-29
Supplement: high-throughput-07-00022-s001.pdf [file high-throughput-07-00022-s001.pdf]

# Supplementary Materials: **New Developments in the Synthesis of EMICORON**

**Massimo Pitorri, Marco Franceschin, Ilaria Serafini, Alessandro Ciccòla, Claudio Frezza and Armandodoriano Bianco**

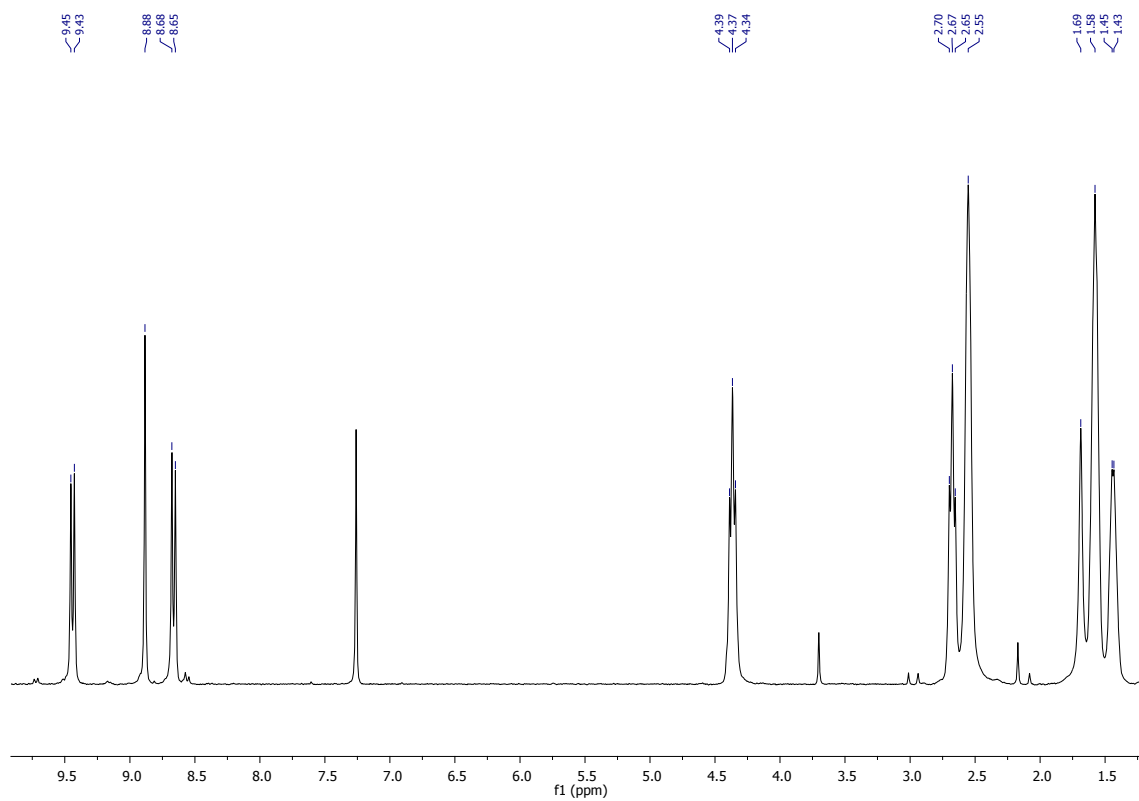

**Figure S1.** <sup>1</sup>H-NMR spectrum of PIPER-Br.

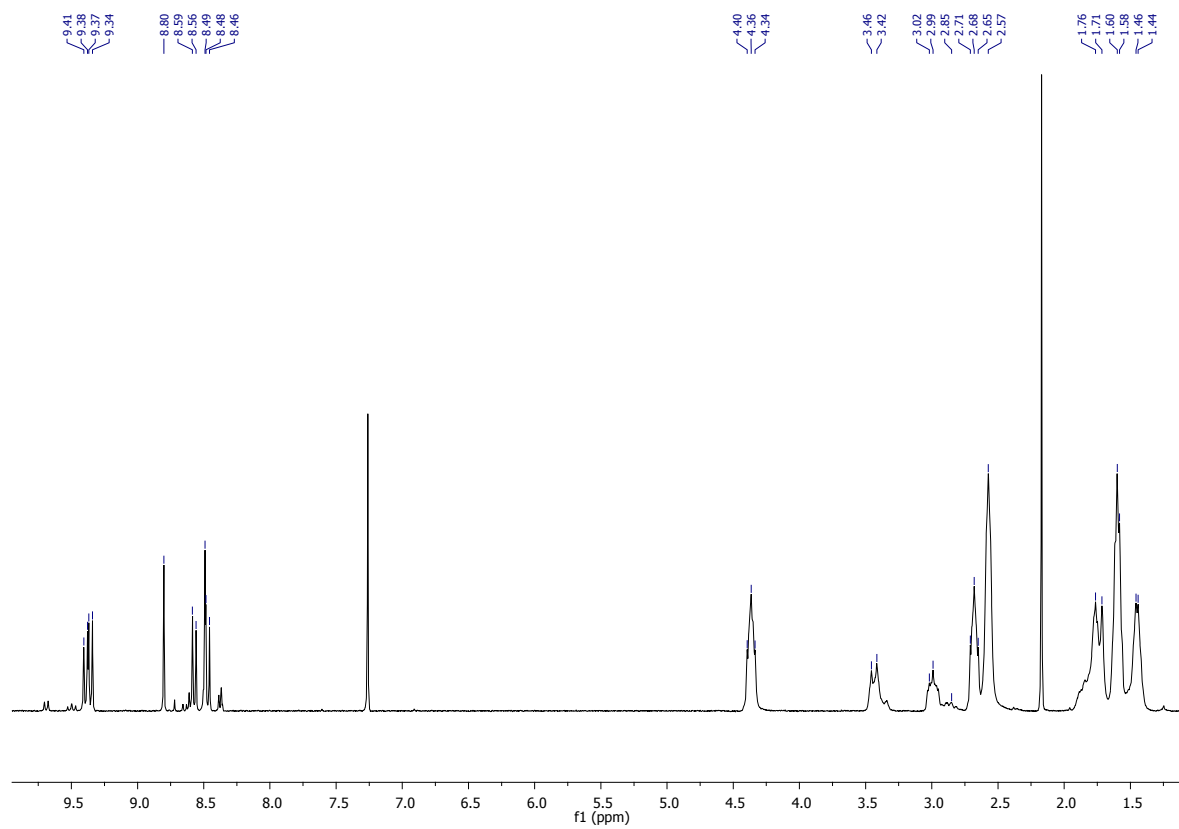

Figure S1. <sup>1</sup>H-NMR spectrum of PIP-PIPER-Br.
